# Supplementary material for: Silicon dioxide nanoparticles induced neurobehavioral impairments by disrupting microbiota–gut–brain axis
Source: PubMed Central journal article supplement (PMC8194163; doi:10.1186/s12951-021-00916-2), 2021-06-10

Figure S1

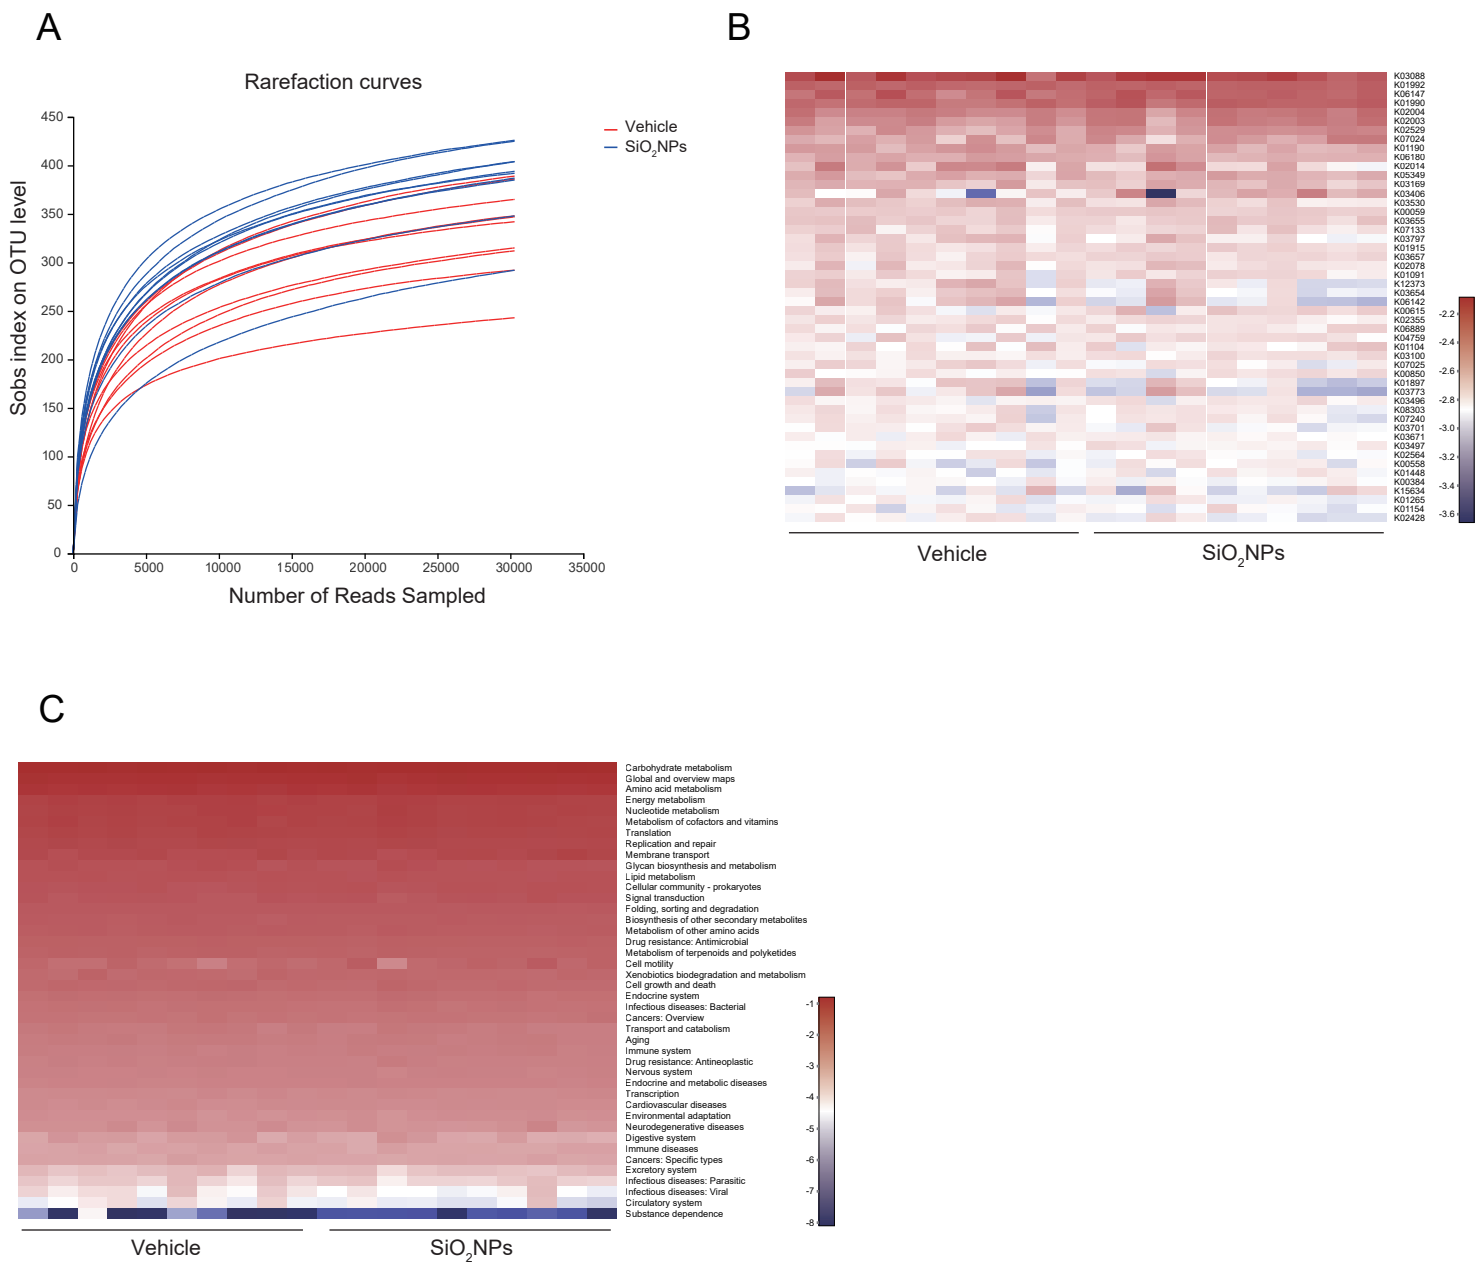

Supplement: 12951_2021_916_MOESM1_ESM.pdf [file 12951_2021_916_MOESM1_ESM.pdf]
